# Supplementary material for: A facile procedure for magnetic fluids using room temperature ionic liquids
Source: Royal Society of Chemistry journal article supplement (doi:10.1039/c2jm14681a), 2012-01-01
Supplement: c2jm14681a.pdf [file c2jm14681a.pdf]

## Supporting Information

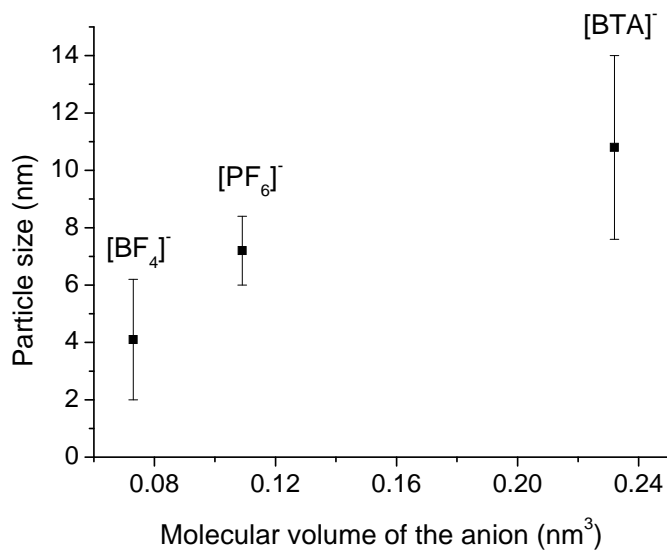

**Figure 1S** Correlation between the observed Co nanoparticle size (as determined by TEM analysis) and the molecular anion of the [BMIm]-IL (molecular volume of the anions as reported in ref.40).
